# Supplementary material for: Biological activities of metal oxide nanoparticles modified with hexadeca-substituted cobalt(ii) phthalocyanine bearing fluorinated substituents
Source: Royal Society of Chemistry journal article supplement (doi:10.1039/d6ra01414c), 2026-05-12
Supplement: d6ra01414c1.pdf [file d6ra01414c1.pdf]

# Biological Activities of Metal Oxide nanoparticles modified with Hexadeca-Substituted Cobalt (II) Phthalocyanine Bearing Fluorinated Substituents

Nazlı Farajzadeh Öztürk\*[a]

[a] Dr., N., Farajzadeh Öztürk  
Faculty of Pharmacy, Department of Analytical Chemistry  
Acıbadem Mehmet Ali Aydınlar University  
Ataşehir, TR-34752, İstanbul, Türkiye  
E-mail: [nazli.ozturk@acibadem.edu.tr](mailto:nazli.ozturk@acibadem.edu.tr)

## Chemicals and nanostructures

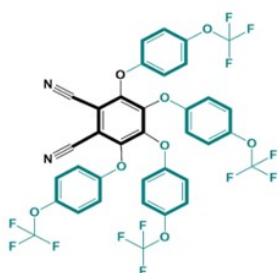

Tetra-substituted phthalonitrile derivative

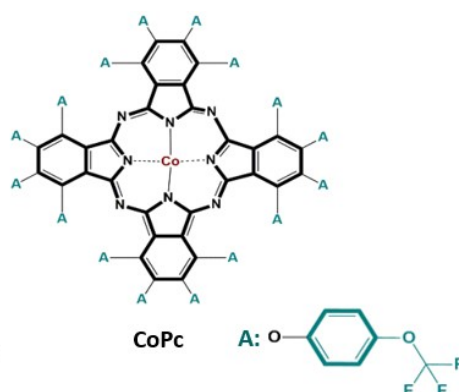

CoPc

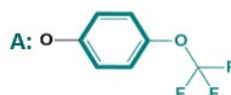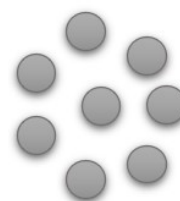

Al<sub>2</sub>O<sub>3</sub>

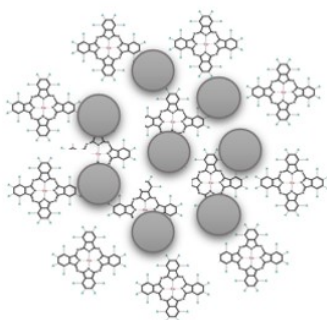

Al<sub>2</sub>O<sub>3</sub>/CoPc

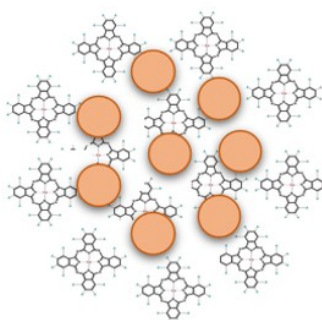

TiO<sub>2</sub>/CoPc

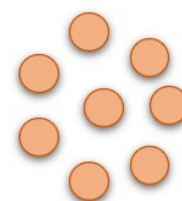

TiO<sub>2</sub>

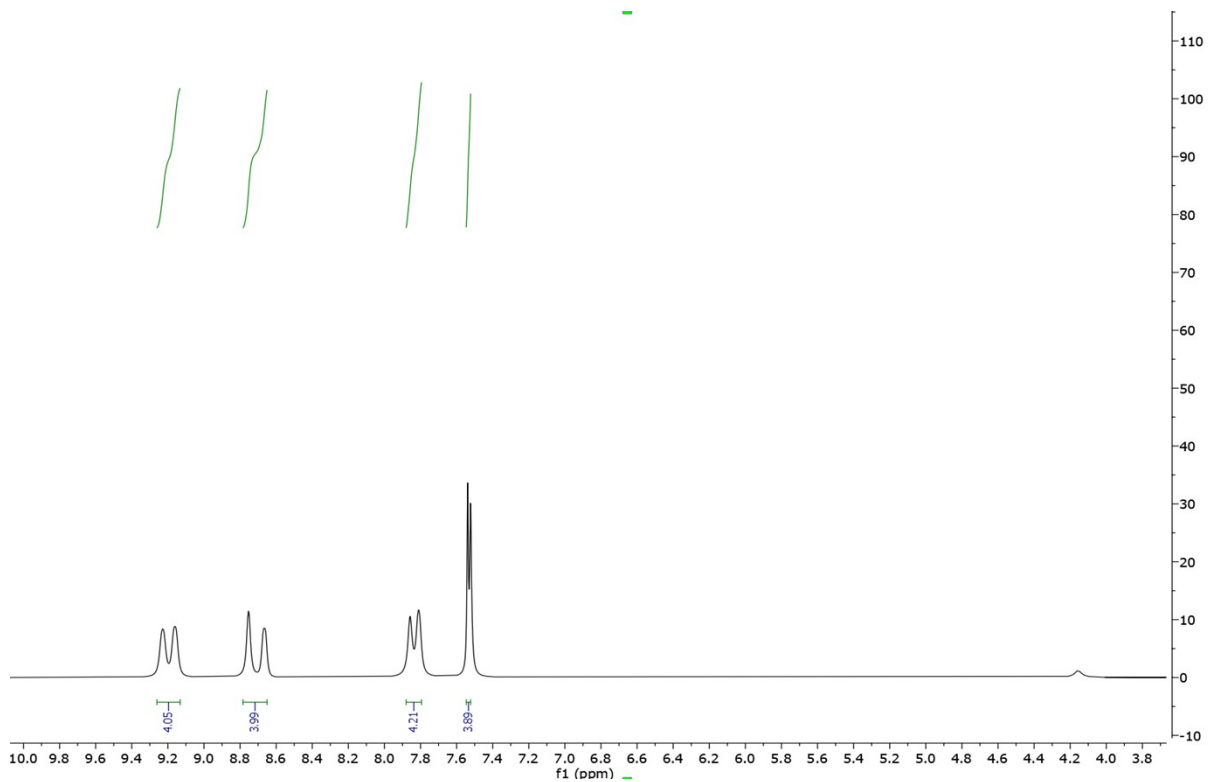

S1. <sup>1</sup>H NMR spectrum of the tetra-substituted phthalonitrile derivative.

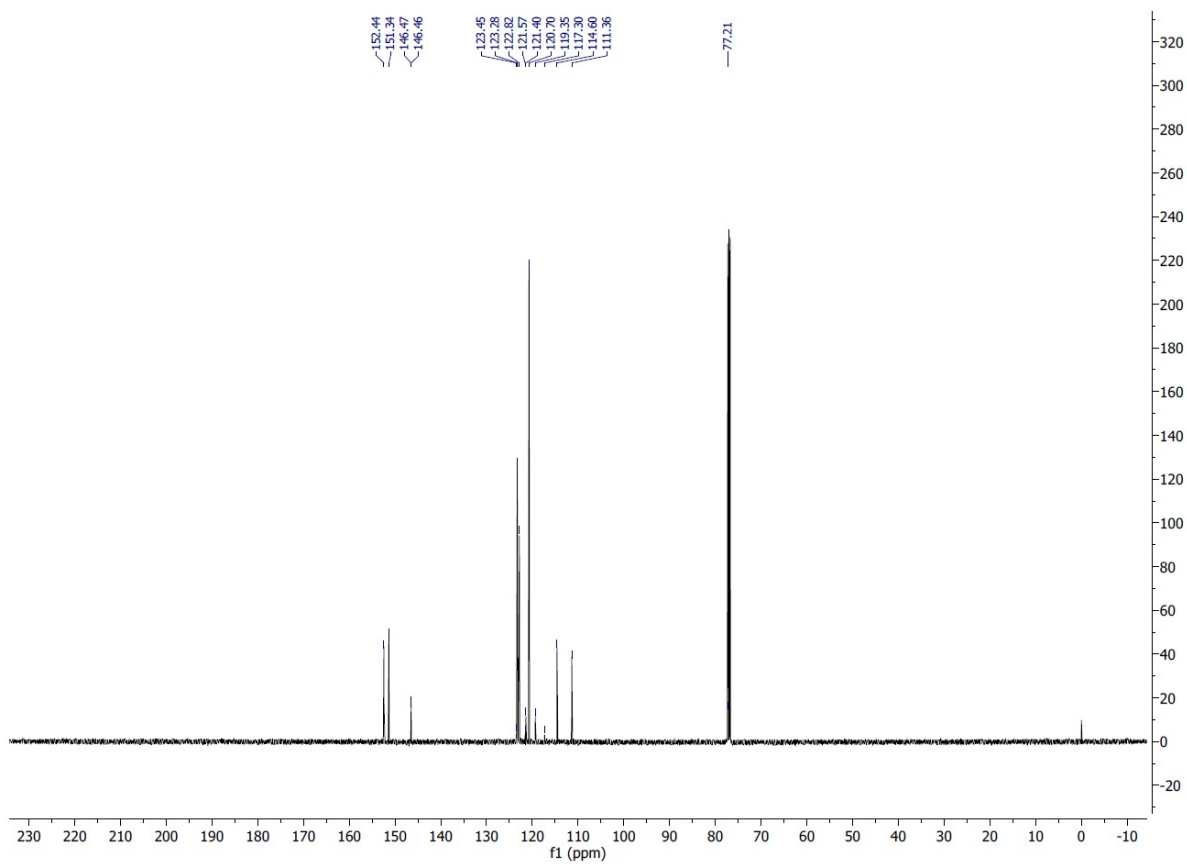

S2. <sup>13</sup>C NMR spectrum of the tetra-substituted phthalonitrile derivative.

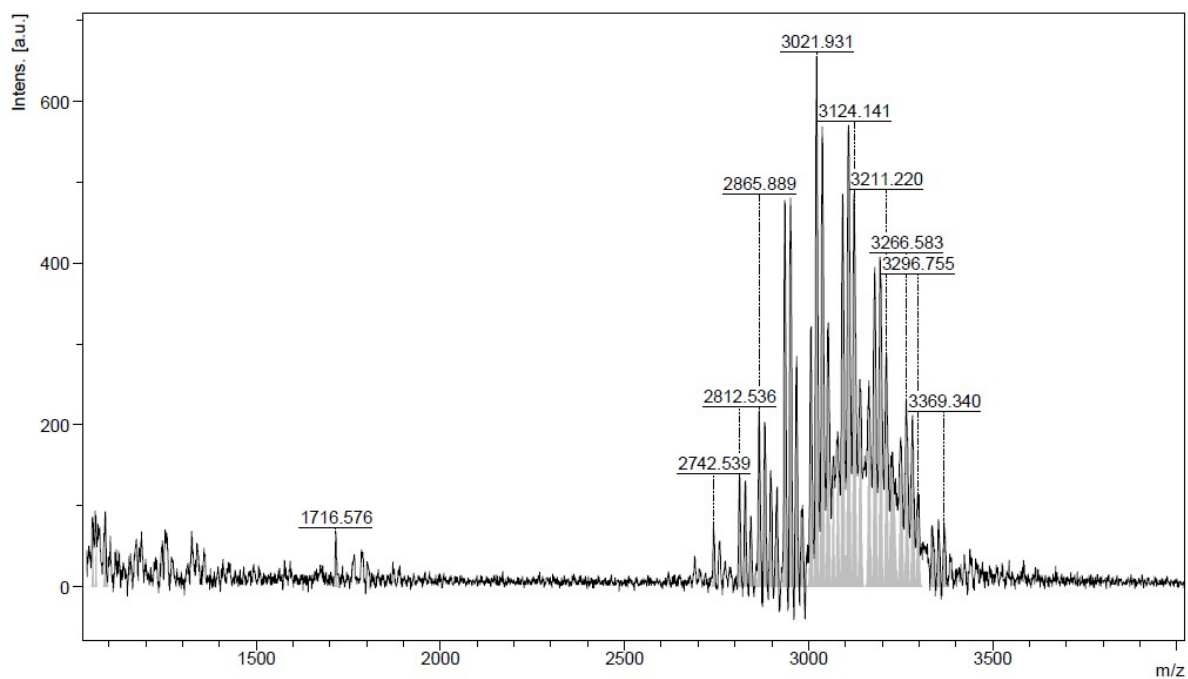

S3. MALDI-TOF spectrum of Compound CoPc.

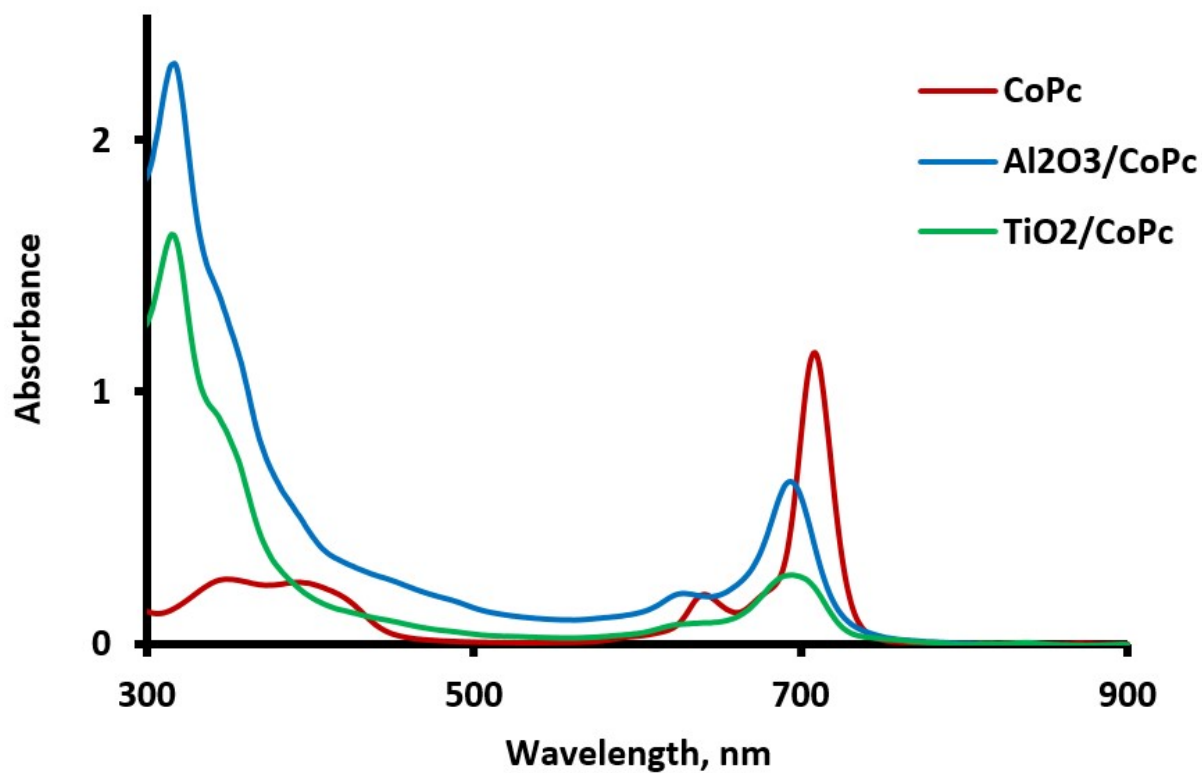

S4. UV-vis spectra of compound CoPc and nanoconjugates ( $\text{Al}_2\text{O}_3/\text{CoPc}$  and  $\text{TiO}_2/\text{CoPc}$ ).

---

**Data output**

|                                       |                               |                             |                 |
|---------------------------------------|-------------------------------|-----------------------------|-----------------|
| <b>Hydrodynamic diameter</b>          | 24,31 nm                      | <b>Polydispersity index</b> | 28,1 %          |
| <b>Intercept <math>g^{1^2}</math></b> | 0,6878                        | <b>Mean intensity</b>       | 289,6 kcounts/s |
| <b>Filter optical density</b>         | 1,7322                        | <b>Baseline</b>             | 1,000           |
| <b>Focus position</b>                 | -0,3 mm                       | <b>Angle used</b>           | Side scatter    |
| <b>Processed runs</b>                 | 25                            | <b>Transmittance</b>        | 65,2 %          |
| <b>Diffusion Coefficient</b>          | 20,2 $\mu\text{m}^2/\text{s}$ |                             |                 |

**Particle size distribution by intensity**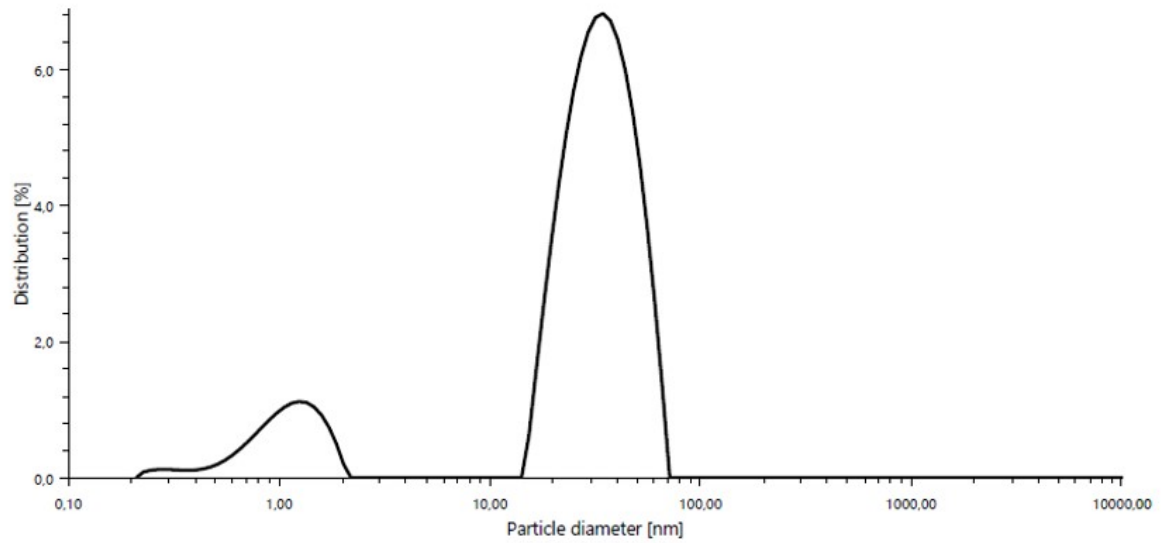

S5. Particle size distribution curve of unmodified alumina nanoparticles ( $\text{Al}_2\text{O}_3$ ).

#### Data output

|                        |                               |                      |                 |
|------------------------|-------------------------------|----------------------|-----------------|
| Hydrodynamic diameter  | 25,24 nm                      | Polydispersity index | 29,2 %          |
| Intercept $g1^2$       | 0,6912                        | Mean intensity       | 291,1 kcounts/s |
| Filter optical density | 1,7394                        | Baseline             | 1,001           |
| Focus position         | -0,2 mm                       | Angle used           | Side scatter    |
| Processed runs         | 25                            | Transmittance        | 65,9 %          |
| Diffusion Coefficient  | 19,4 $\mu\text{m}^2/\text{s}$ |                      |                 |

#### Particle size distribution by intensity

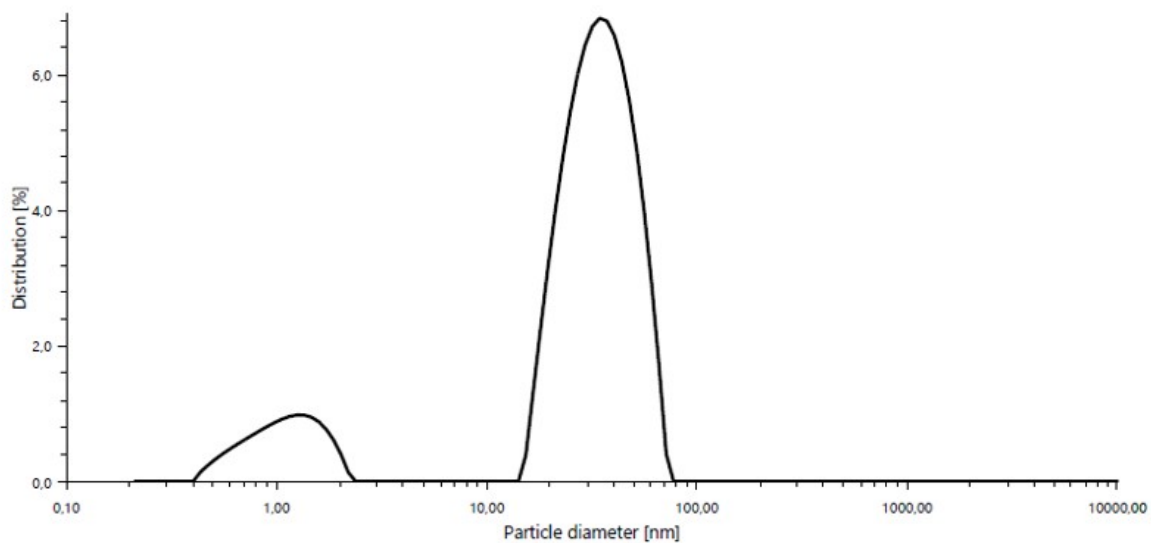

S6. Particle size distribution curve of unmodified titania nanoparticles ( $\text{TiO}_2$ ).

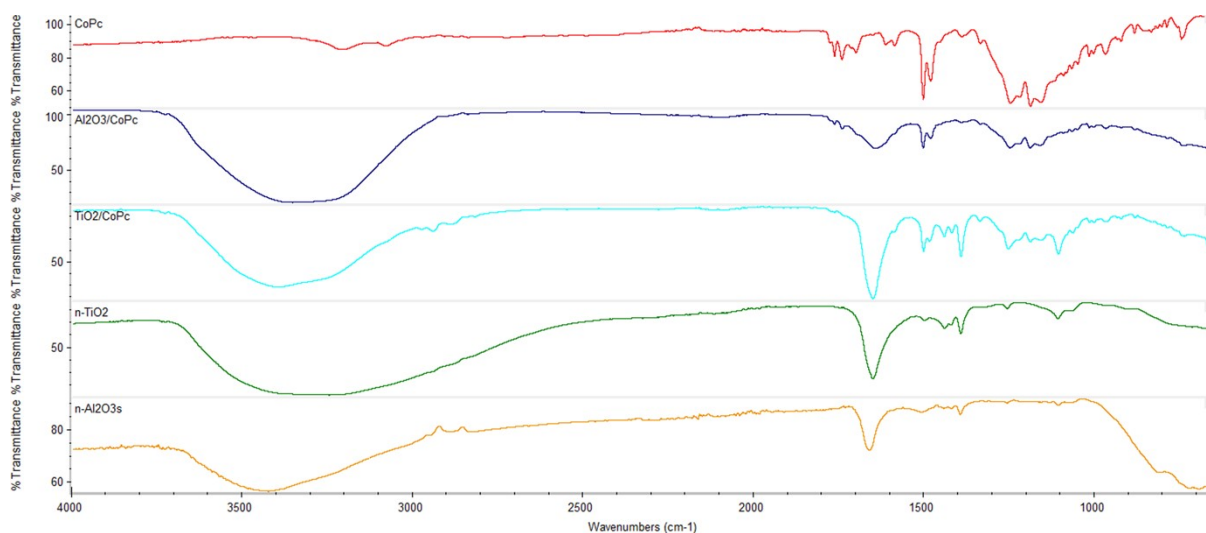

S7. FT-IR spectra of compound CoPc, unmodified nanostructures ( $\text{Al}_2\text{O}_3$  and  $\text{TiO}_2$ ), and nanoconjugates ( $\text{Al}_2\text{O}_3/\text{CoPc}$  and  $\text{TiO}_2/\text{CoPc}$ ).

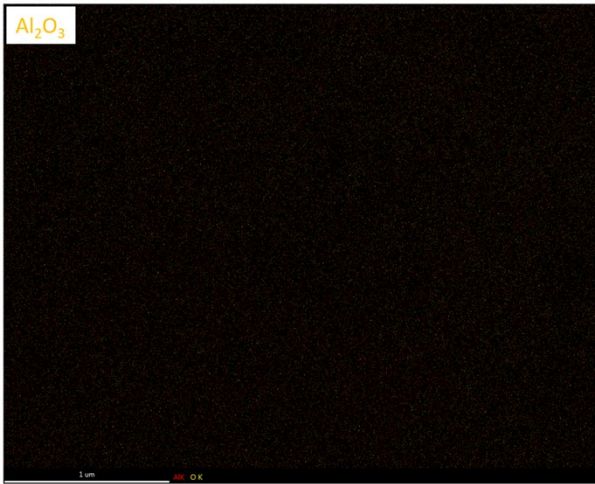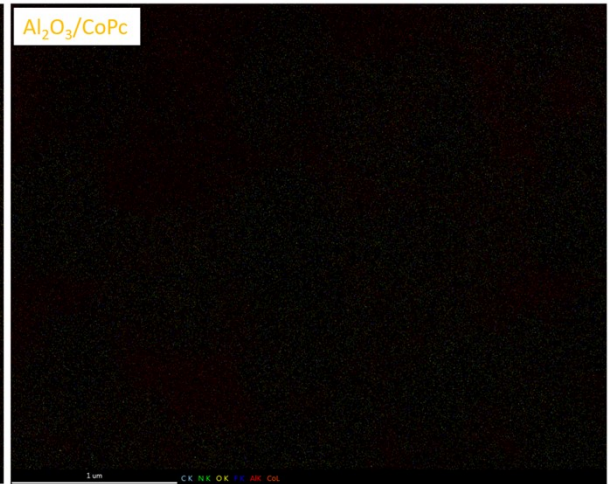

S8. Elemental mapping analysis of unmodified nanostructures (Al<sub>2</sub>O<sub>3</sub>) and nanoconjugate (Al<sub>2</sub>O<sub>3</sub>/CoPc).

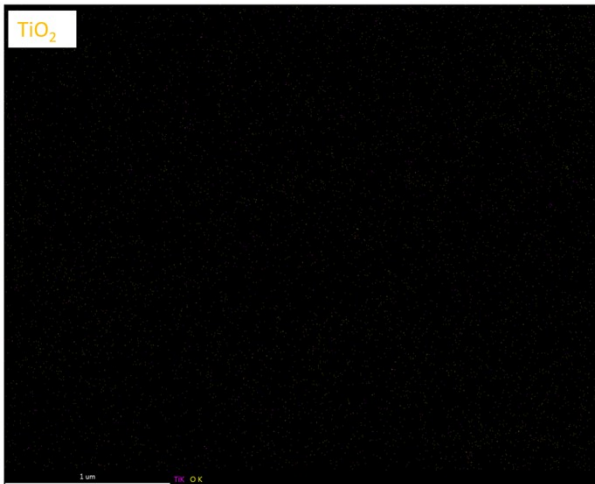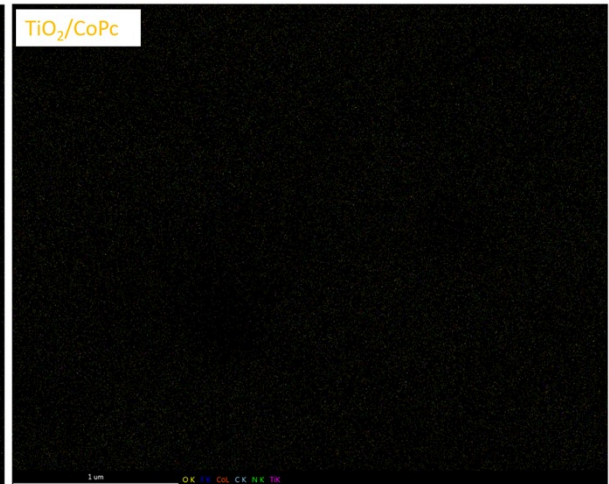

S9. Elemental mapping analysis of unmodified nanostructures (TiO<sub>2</sub>), and nanoconjugates (TiO<sub>2</sub>/CoPc).
